# Supplementary material for: cigChannel: a large-scale 3D seismic dataset with labeled paleochannels for advancing deep learning in seismic interpretation
Source: Copernicus journal article supplement (doi:10.5194/essd-17-3447-2025), 2025-07-21
Supplement: Supplementary file 1 [file essd-17-3447-2025-supplement.pdf]

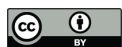

*Supplement of*

## **cigChannel: a large-scale 3D seismic dataset with labeled paleochannels for advancing deep learning in seismic interpretation**

**Guangyu Wang et al.**

*Correspondence to:* Xinming Wu ([xinmwu@ustc.edu.cn](mailto:xinmwu@ustc.edu.cn))

The copyright of individual parts of the supplement might differ from the article licence.

## **Contents:**

- **Figure S1: Seismic impedance volumes in the *cigChannel* dataset.**
- **Figure S2: Sedimentary facies volumes in the *cigChannel* dataset.**

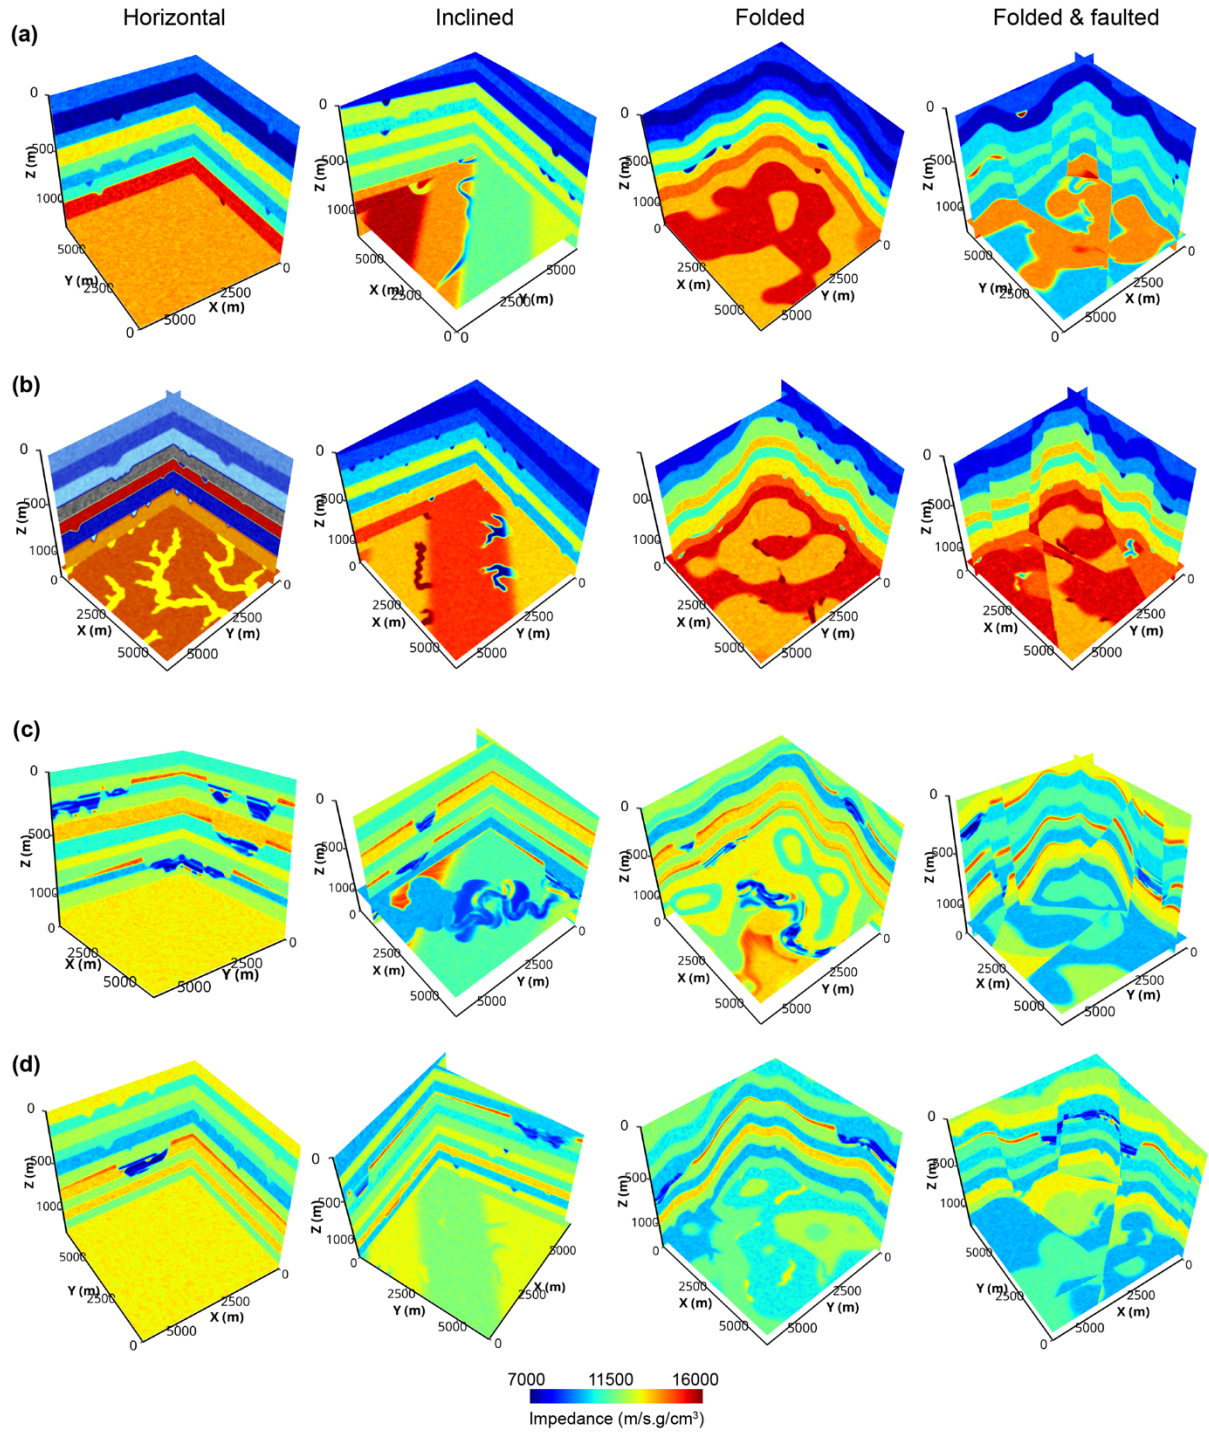

**Figure S1.** Seismic impedance volumes in the (a) meandering channel, (b) tributary channel network, (c) submarine canyon and (d) assorted channel subsets of the *cigChannel* dataset. These impedance volumes correspond to the seismic volumes demonstrated in Figure 9 in the main text.

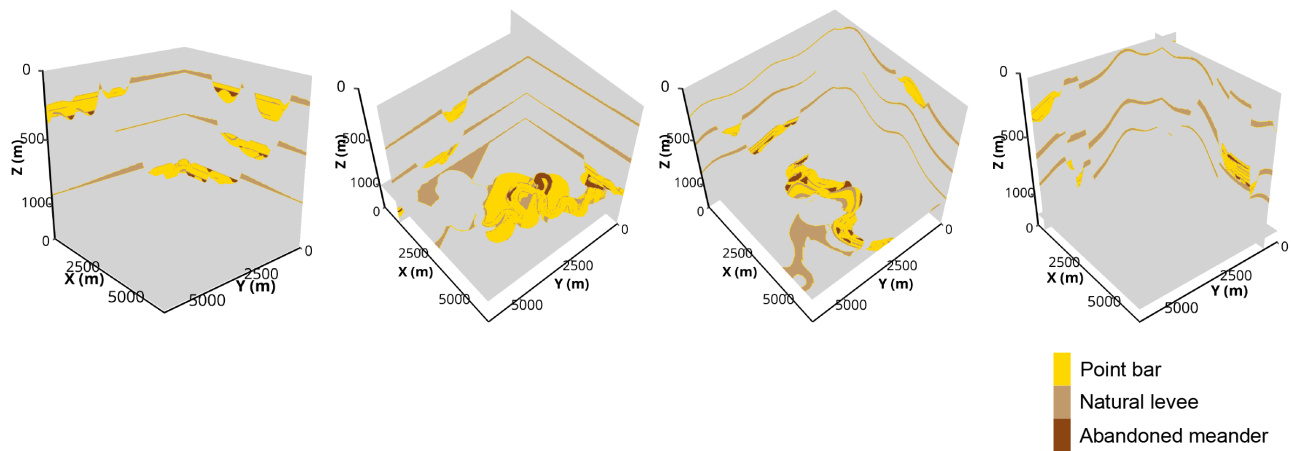

10

**Figure S2.** Sedimentary facies volumes in the submarine canyon subset of the *cigChannel* dataset, which correspond to the seismic volumes demonstrated in Figure 9c in the main text.
